# Supplementary material for: One-pot synthesis of amines from biomass resources catalyzed by HReO4
Source: Royal Society of Chemistry journal article supplement (doi:10.1039/c8gc00915e), 2018-01-01
Supplement: c8gc00915e1.pdf [file c8gc00915e1.pdf]

## One-pot synthesis of amines from biomass resources catalyzed by $\text{HReO}_4$

João A. T. Caetano and Ana C. Fernandes\*

Centro de Química Estrutural, Instituto Superior Técnico, Universidade de Lisboa, Av.

Rovisco Pais, 1049-001 Lisboa, Portugal.

[anacristinafernandes@tecnico.ulisboa.pt](mailto:anacristinafernandes@tecnico.ulisboa.pt)

|   |                                                                                           |   |
|---|-------------------------------------------------------------------------------------------|---|
| 1 | General information                                                                       | 1 |
| 2 | General procedure for the conversion of xylose into furfural catalyzed by $\text{HReO}_4$ | 2 |
| 3 | General procedure for the one-pot synthesis of furfurylamines                             | 2 |
| 4 | Characterization of the products                                                          | 2 |

### 1. General information

All the reactions were carried out under air atmosphere and without any dry solvent. Carbohydrates, anilines, silanes and the catalyst  $\text{HReO}_4$  (75-80% aqueous solution) were obtained from commercial suppliers and were used without further purification. Flash chromatography was performed on MN Kieselgel 60M 230-400 mesh.  $^1\text{H}$  NMR,  $^{13}\text{C}$  NMR and  $^{31}\text{P}$  NMR spectra were measured on a Bruker Avance II<sup>+</sup> 400 MHz and 300 MHz spectrometers. Chemical shifts are reported in parts per million (ppm) downfield from an internal standard. The furfural yields were determined by  $^1\text{H}$  NMR spectroscopy using mesitylene as internal standard, the pulse sequence zg30, D1 = 1.0 s and position of O1 = 2470.97 Hz.

## 2. General procedure for the conversion of xylose into furfural catalyzed by HReO<sub>4</sub>

To a Schlenk flask equipped with a J. Young tap containing a solution of xylose (1.0 mmol) in 1,4-dioxane (10 mL) was added HReO<sub>4</sub> (5 mol%). The reaction mixture was stirred in a closed Schlenk at 140 °C during 2 h. The yield of furfural was determined by spectroscopy <sup>1</sup>H NMR using mesitylene as internal standard.

## 3. General procedure for the one-pot synthesis of furfurylamines

To a Schlenk flask equipped with a J. Young tap containing a solution of carbohydrate (1.0 mmol of pentose) in 1,4-dioxane (10 mL) was added HReO<sub>4</sub> (5 mol%). The reaction mixture was stirred in a closed Schlenk at 140 °C during 2 h. Then, the reaction mixture was cooled at room temperature and aniline (1.0 mmol) and dimethylphenylsilane (1.2 mmol) was added. After 1h at 140°C, the reaction mixture was evaporated and the residue was purified by flash chromatography with appropriate mixtures of *n*-hexane:ethyl acetate, affording the furfurylamines.

## 4. Characterization of the products

Table 3, entry 2

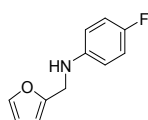

<sup>1</sup>H NMR (300 MHz, CDCl<sub>3</sub>): δ 7.39 (s, 1H), 6.95 (t, *J* = 8.70, 8.73 Hz, 2H), 6.64-6.60 (m, 2H), 6.35 (d, *J* = 3.06 Hz, 1H), 6.25 (d, *J* = 3.06 Hz, 1H), 4.29 (s, 2H), 3.89 (brs, 1H) ppm. <sup>13</sup>C NMR (75 MHz, CDCl<sub>3</sub>): δ 156.2 (d, *J*<sub>CF</sub> = 241.5 Hz), 152.7, 144.0 (d, *J*<sub>CF</sub> = 1.93 Hz), 142.1, 115.7 (d, *J*<sub>CF</sub> = 22.2 Hz), 114.2 (d, *J*<sub>CF</sub> = 7.4 Hz), 110.4, 107.2, 42.1 ppm. Anal. Calcd. for C<sub>11</sub>H<sub>10</sub>FNO: C, 69.10; H, 5.27; N, 7.33. Found: C, 69.33; H, 5.48; N, 7.59.

Table 3, entry 3

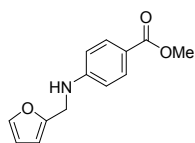

<sup>1</sup>H NMR (300 MHz, CDCl<sub>3</sub>): δ 7.87 (d, *J* = 8.67 Hz, 2H), 7.36 (s, 1H), 6.61 (d, *J* = 8.67 Hz, 2H), 6.31 (d, *J* = 0.69 Hz, 1H), 6.22 (d, *J* = 3.0 Hz, 1H), 4.68 (brs, 1H), 4.33 (d,

$J = 2.91\text{ Hz}$ , 2H), 3.83 (s, 3H) ppm.  $^{13}\text{C}$  NMR (75 MHz,  $\text{CDCl}_3$ ):  $\delta$  167.4, 151.8, 151.5, 142.2, 131.5, 118.8, 111.8, 110.5, 107.4, 51.6, 40.7 ppm. Anal. Calcd. for  $\text{C}_{13}\text{H}_{13}\text{NO}_3$ : C, 67.52; H, 5.67; N, 6.06. Found: C, 67.83; H, 5.90; N, 6.27.

Table 3, entry 4

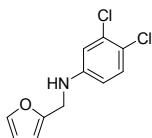

$^1\text{H}$  NMR (300 MHz,  $\text{CDCl}_3$ ):  $\delta$  7.38 (t,  $J = 0.81, 0.9\text{ Hz}$ , 1H), 7.19 (d,  $J = 8.73\text{ Hz}$ , 1H), 6.73 (d,  $J = 2.58\text{ Hz}$ , 1H), 6.48 (dd,  $J = 2.64, 6.09\text{ Hz}$ , 1H), 6.34-6.33 (m, 1H), 6.24 (d,  $J = 3.12\text{ Hz}$ , 1H), 4.27 (s, 2H), 4.13 (brs, 1H) ppm.  $^{13}\text{C}$  NMR (75 MHz,  $\text{CDCl}_3$ ):  $\delta$  151.7, 147.1, 142.3, 132.8, 130.7, 120.4, 114.2, 112.9, 110.5, 107.5, 41.3 ppm. Anal. Calcd. for  $\text{C}_{11}\text{H}_9\text{Cl}_2\text{NO}$ : C, 54.57; H, 3.75; N, 5.79. Found: C, 54.70; H, 3.93; N, 5.96.

Table 3, entry 5

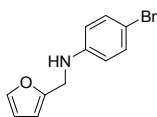

$^1\text{H}$  NMR (300 MHz,  $\text{CDCl}_3$ ):  $\delta$  7.37 (s, 1H), 7.26 (d,  $J = 8.73\text{ Hz}$ , 2H), 6.55 (d,  $J = 8.73\text{ Hz}$ , 2H), 6.32 (d,  $J = 1.68\text{ Hz}$ , 1H), 6.23 (d,  $J = 2.82\text{ Hz}$ , 1H), 4.29 (s, 2H), 4.05 (brs, 1H) ppm.  $^{13}\text{C}$  NMR (75 MHz,  $\text{CDCl}_3$ ):  $\delta$  152.3, 146.7, 142.2, 132.1, 114.8, 110.5, 109.8, 107.3, 41.5 ppm. Anal. Calcd. for  $\text{C}_{11}\text{H}_{10}\text{BrNO}$ : C, 52.41; H, 4.00; N, 5.56. Found: C, 52.58; H, 3.98; N, 5.69.

Table 3, entry 6

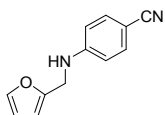

$^1\text{H}$  NMR (300 MHz,  $\text{CDCl}_3$ ):  $\delta$  7.42 (s, 1H), 7.38 (d,  $J = 3.18\text{ Hz}$ , 2H), 6.64 (d,  $J = 8.58\text{ Hz}$ , 2H), 6.34 (s, 1H), 6.26 (d,  $J = 2.82\text{ Hz}$ , 1H), 4.87 (brs, 1H), 4.35 (d,  $J = 5.25\text{ Hz}$ , 2H) ppm.  $^{13}\text{C}$  NMR (75 MHz,  $\text{CDCl}_3$ ):  $\delta$  151.2, 150.8, 142.2, 133.5, 120.4, 112.4, 110.4, 107.5, 98.8, 40.3 ppm. Anal. Calcd. for  $\text{C}_{12}\text{H}_{10}\text{N}_2\text{O}$ : C, 72.71; H, 5.08; N, 14.13. Found: C, 72.97; H, 5.28; N, 14.29.

Table 3, entry 7

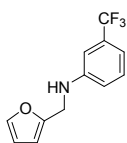

$^1\text{H}$  NMR (300 MHz,  $\text{CDCl}_3$ ):  $\delta$  7.35 (s, 1H), 7.24 (s, 1H), 6.95 (d,  $J = 6.27$  Hz, 1H), 6.85 (s, 1H), 6.77 (d,  $J = 7.65$  Hz, 1H), 6.31 (s, 1H), 6.23 (s, 1H), 4.31 (s, 2H), 4.21 (brs, 1H) ppm.  $^{13}\text{C}$  NMR (75 MHz,  $\text{CDCl}_3$ ):  $\delta$  152.0, 147.8, 142.3, 131.65 (q,  $J_{\text{CF}} = 31.56$  Hz), 129.8, 124.4 (d,  $J_{\text{CF}} = 270.6$  Hz), 116.1, 114.5 (d,  $J_{\text{CF}} = 3.68$  Hz), 110.5, 109.40 (d,  $J_{\text{CF}} = 3.62$  Hz), 107.5, 41.2 ppm. Anal. Calcd. for  $\text{C}_{12}\text{H}_{10}\text{F}_3\text{NO}$ : C, 59.75; H, 4.18; N, 5.81. Found: C, 59.91; H, 4.33; N, 5.99.

Table 3, entry 8

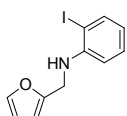

$^1\text{H}$  NMR (300 MHz,  $\text{CDCl}_3$ ):  $\delta$  7.70 (d,  $J = 7.32$  Hz, 1H), 7.40 (s, 1H), 7.22 (t,  $J = 7.48, 7.24$  Hz, 1H), 6.67 (d,  $J = 7.92$  Hz, 1H), 6.49 (t,  $J = 7.16, 6.88$  Hz, 1H), 6.35 (s, 1H), 6.27 (s, 1H), 4.59 (brs, 1H), 4.37 (s, 2H) ppm.  $^{13}\text{C}$  NMR (75 MHz,  $\text{CDCl}_3$ ):  $\delta$  152.1, 146.8, 142.1, 139.2, 129.5, 119.3, 111.0, 110.5, 107.2, 85.7, 41.7 ppm. Anal. Calcd. for  $\text{C}_{11}\text{H}_{10}\text{INO}$ : C, 44.17; H, 3.37; N, 4.68. Found: C, 44.30; H, 3.51; N, 4.82.

Table 3, entry 9

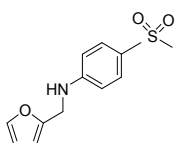

$^1\text{H}$  NMR (300 MHz,  $\text{CDCl}_3$ ):  $\delta$  7.63 (d,  $J = 8.79$  Hz, 2H), 7.33 (d,  $J = 0.96$  Hz, 1H), 6.66 (d,  $J = 8.79$  Hz, 2H), 6.29 (d,  $J = 1.2$  Hz, 1H), 6.22 (s, 1H), 4.99 (brs, 1H), 4.32 (d,  $J = 4.95$  Hz, 2H), 2.95 (s, 3H) ppm.  $^{13}\text{C}$  NMR (75 MHz,  $\text{CDCl}_3$ ):  $\delta$  151.8, 151.3, 142.2, 129.2, 127.4, 112.1, 110.4, 107.5, 45.0, 40.4 ppm. Anal. Calcd. for  $\text{C}_{13}\text{H}_{16}\text{NO}_3\text{S}$ : C, 58.62; H, 6.06; N, 5.26. Found: C, 58.79; H, 6.20; N, 5.38.

Table 3, entry 10

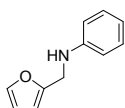

$^1\text{H}$  NMR (300 MHz,  $\text{CDCl}_3$ ):  $\delta$  7.37 (s, 1H), 7.20 (t,  $J = 7.50, 8.22$  Hz, 2H), 6.75 (t,  $J = 7.29, 7.35$  Hz, 1H), 6.69 (d,  $J = 8.4$  Hz, 2H), 6.33 (dd,  $J = 2.04, 0.96$  Hz, 1H), 6.24 (d,  $J = 3.06$  Hz), 4.33 (s, 2H), 4.02 (brs, 1H) ppm.  $^{13}\text{C}$  NMR (75 MHz,  $\text{CDCl}_3$ ):  $\delta$  152.9, 147.8, 142.1, 129.4, 118.2, 113.3, 110.5, 107.1, 41.6 ppm. Anal. Calcd. for  $\text{C}_{11}\text{H}_{11}\text{NO}$ : C, 76.28; H, 6.40; N, 8.09. Found: C, 76.40; H, 6.59; N, 8.30.

Table 3, entry 11

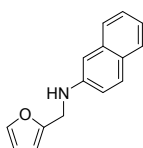

$^1\text{H}$  NMR (300 MHz,  $\text{CDCl}_3$ ):  $\delta$  7.70-7.62 (m, 3H), 7.40-7.35 (m, 2H), 7.25-7.20 (m, 1H), 6.94-6.91 (m, 2H), 6.34 (d,  $J = 4.92$  Hz, 1H), 6.29 (d,  $J = 3.15$  Hz, 1H), 4.43 (s, 2H) ppm.  $^{13}\text{C}$  NMR (75 MHz,  $\text{CDCl}_3$ ):  $\delta$  152.5, 145.3, 142.1, 135.1, 129.1, 127.9, 127.7, 126.5, 126.2, 122.4, 118.1, 110.5, 107.3, 105.3, 41.6 ppm. Anal. Calcd. for  $\text{C}_{15}\text{H}_{13}\text{NO}$ : C, 80.69; H, 5.87; N, 6.27. Found: C, 80.81; H, 6.05; N, 6.33.

Table 3, entry 12

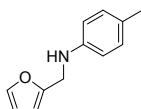

$^1\text{H}$  NMR (300 MHz,  $\text{CDCl}_3$ ):  $\delta$  7.38 (s, 1H), 7.01 (d,  $J = 8.1$  Hz, 2H), 6.62 (d,  $J = 8.25$  Hz, 2H), 6.33 (s, 1H), 6.24 (d,  $J = 2.79$  Hz, 1H), 4.31 (s, 2H), 2.26 (s, 3H) ppm.  $^{13}\text{C}$  NMR (75 MHz,  $\text{CDCl}_3$ ):  $\delta$  153.1, 145.5, 142.0, 129.8, 127.4, 113.5, 110.4, 107.0, 41.9, 20.5 ppm. Anal. Calcd. for  $\text{C}_{12}\text{H}_{13}\text{NO}$ : C, 76.98; H, 7.00; N, 7.48. Found: C, 77.12; H, 7.15; N, 7.63.

Table 3, entry 13

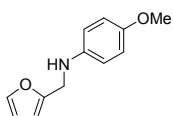

$^1\text{H}$  NMR (300 MHz,  $\text{CDCl}_3$ ):  $\delta$  7.42 (s, 1H), 6.85 (d,  $J = 5.04$  Hz, 2H), 6.68 (d,  $J = 7.26$  Hz, 2H), 6.37 (s, 1H), 6.27 (s, 1H), 4.30 (s, 2H), 3.78 (s, 4H) ppm.  $^{13}\text{C}$  NMR (101 MHz,

CDCl<sub>3</sub>):  $\delta$  153.0, 152.4, 141.8, 141.7, 114.7, 114.5, 110.3, 106.8, 55.5, 42.2 ppm. Anal. Calcd. for C<sub>12</sub>H<sub>13</sub>NO<sub>2</sub>: C, 70.92; H, 6.45; N, 6.89. Found: C, 71.10; H, 6.59; N, 7.01.

Table 3, entry 14

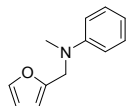

<sup>1</sup>H NMR (300 MHz, CDCl<sub>3</sub>):  $\delta$  7.36 (s, 1H), 7.29-7.23 (m, 2H), 6.85 (d,  $J$  = 8.22 Hz, 2H), 6.76 (t,  $J$  = 7.26 Hz, 1H), 6.31 (s, 1H), 6.15 (d,  $J$  = 2.76 Hz, 1H), 4.48 (s, 2H), 3.01 (s, 3H) ppm. <sup>13</sup>C NMR (75 MHz, CDCl<sub>3</sub>):  $\delta$  152.3, 149.4, 141.8, 129.1, 117.1, 113.0, 110.2, 107.2, 49.9, 38.3 ppm. Anal. Calcd. for C<sub>12</sub>H<sub>13</sub>NO: C, 76.98; H, 7.00; N, 7.48. Found: C, 77.11; H, 7.16; N, 7.59.
